# Supplementary material
Source: publisher figshare collection journal article supplement (https://acs.figshare.com/ndownloader/files/10080147)
Supplement: Supplementary file 1 [file 10080147]

## Electronic Supporting Information

### Ultrafast Electron Transfer Across a Nanocapsular Wall: Coumarins as Donors, Viologen as Acceptor and Octa Acid Capsule as the Mediator

Chi-Hung Chuang,<sup>†</sup> Mintu Porel,<sup>‡</sup> Rajib Choudhury,<sup>#</sup> Clemens Burda,<sup>\*,†</sup> and  
V. Ramamurthy<sup>\*,‡</sup>

<sup>†</sup>Center for Chemical Dynamics and Nanomaterials Research, Department of Chemistry, Case Western Reserve University, 10900 Euclid Avenue, Cleveland, Ohio 44106.

<sup>‡</sup>Department of Chemistry, University of Miami, Coral Gables, Florida 33124.

<sup>#</sup>Department of Physical Sciences, Arkansas Tech University, Russellville, AR 72801, USA

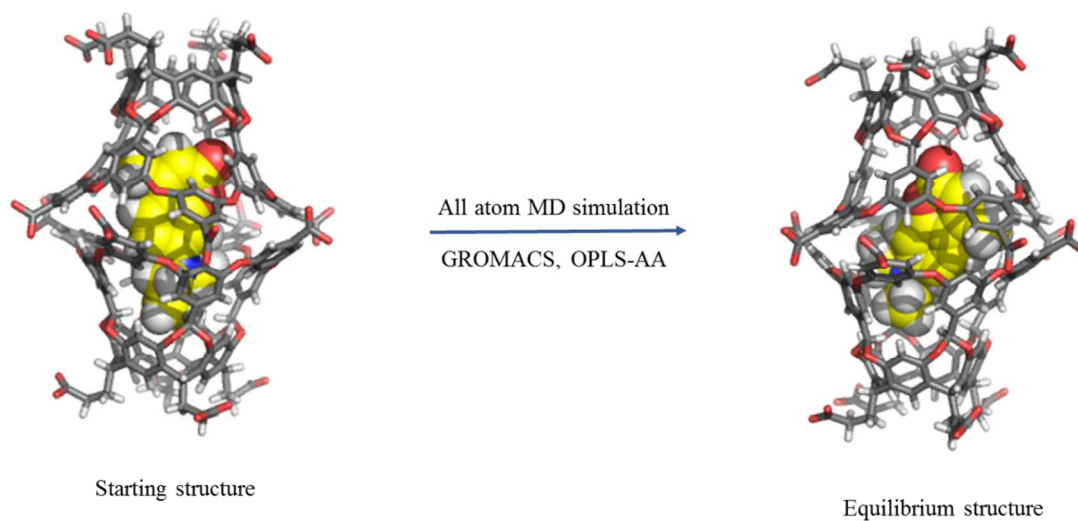

**Figure S1.** Starting and equilibrium structures of C1@OA<sub>2</sub> complexes.

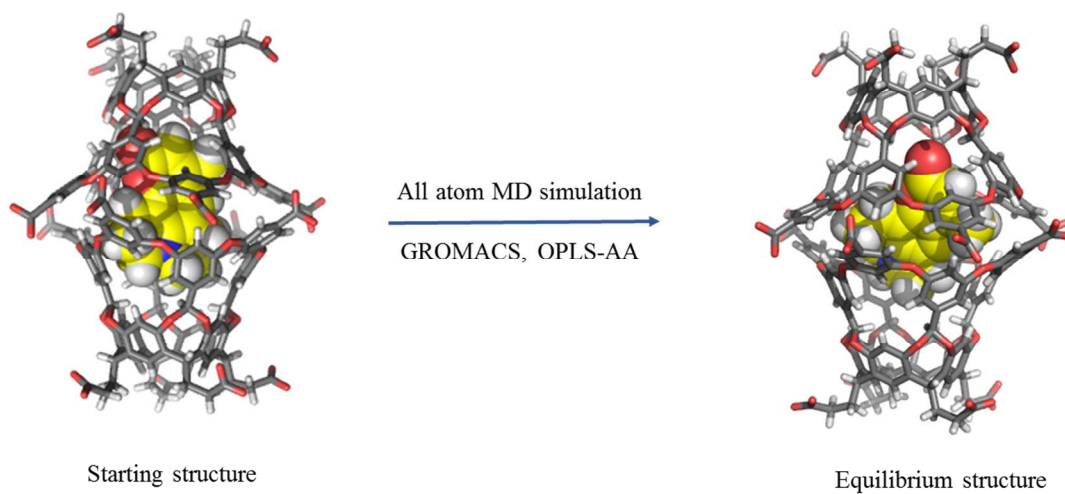

**Figure S2.** Starting and equilibrium structures of C480@OA<sub>2</sub> complexes.

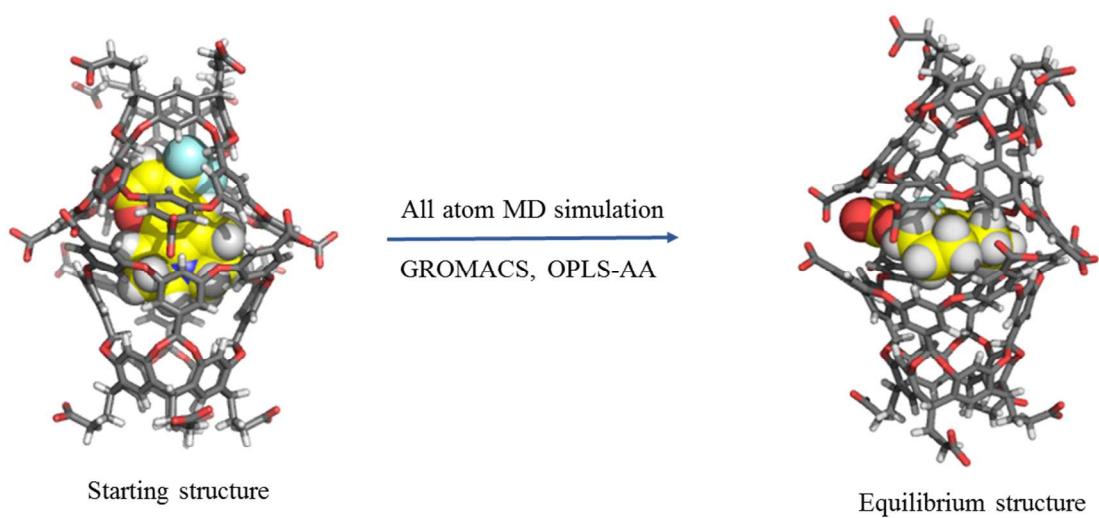

**Figure S3.** Starting and equilibrium structures of C153@OA<sub>2</sub> complexes.

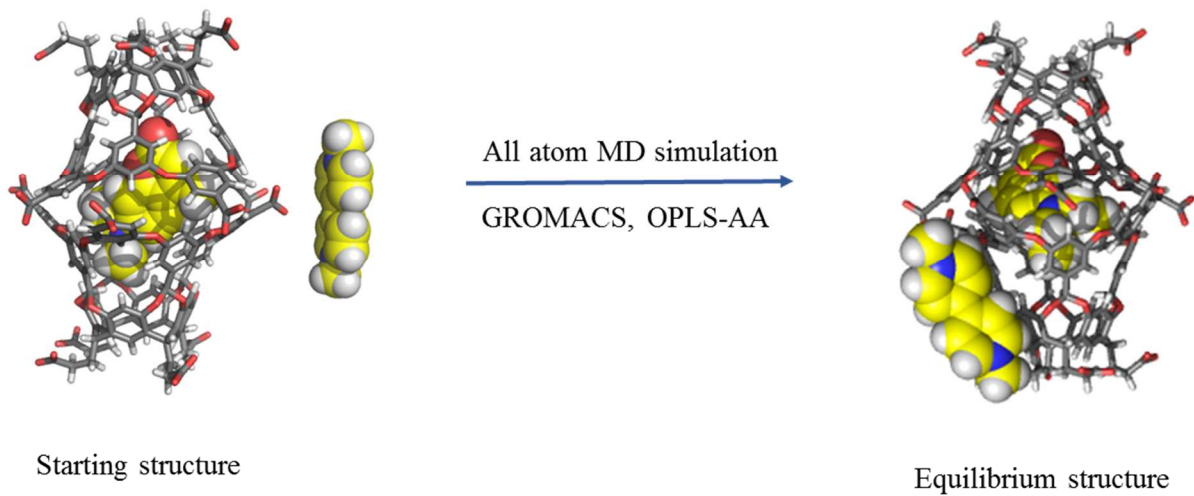

**Figure S4.** Starting and equilibrium structures of C1@OA<sub>2</sub>-MV<sup>2+</sup> complexes.

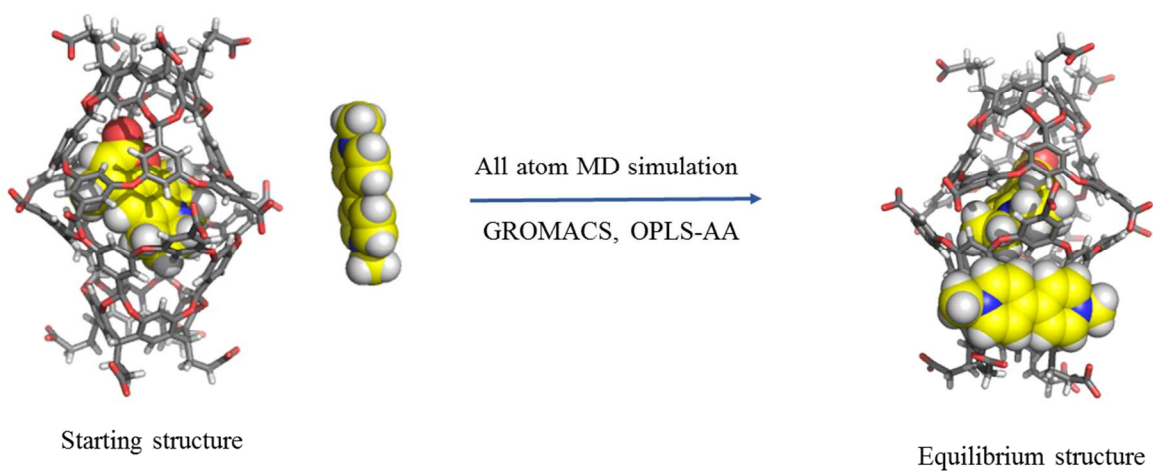

**Figure S5.** Starting and equilibrium structures of C480@OA<sub>2</sub>-MV<sup>2+</sup> complexes.

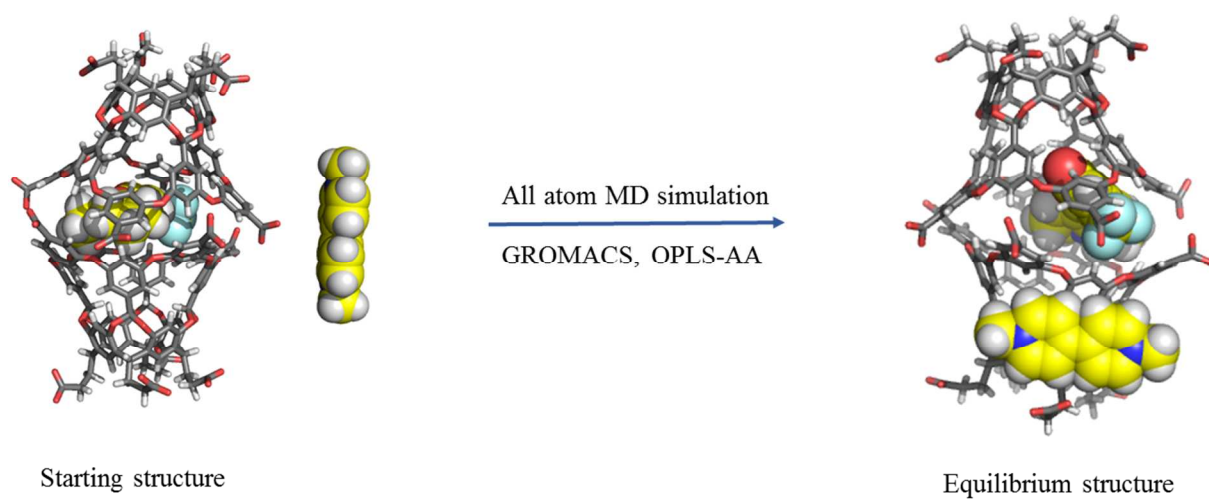

**Figure S6.** Starting and equilibrium structures of C153@OA<sub>2</sub>-MV<sup>2+</sup> complexes.
